# Supplementary material for: Childhood Obesity and Overweight in Ghana: A Systematic Review and Meta-Analysis
Source: PubMed Central journal article supplement (PMC7168721; doi:10.1155/2020/1907416), 2020-04-08
Supplement: 1907416.f1.pdf [file 1907416.f1.pdf]

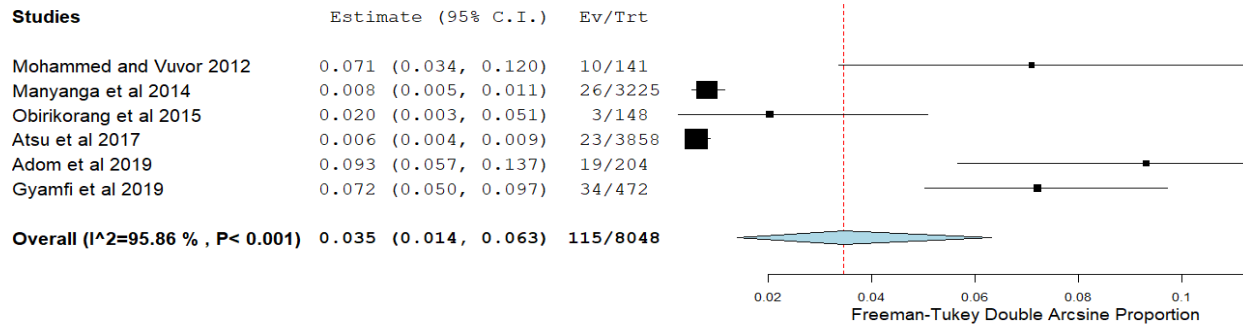

Figure 1.0 Forest plot of studies reporting prevalence of childhood obesity among males in Ghana

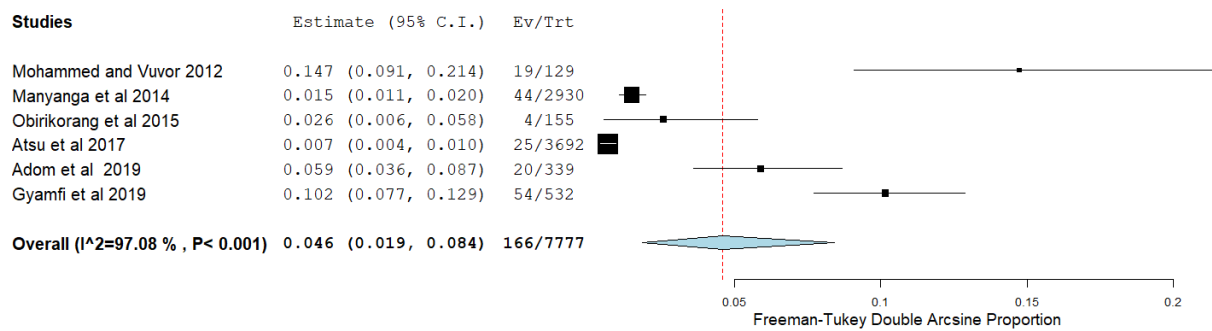

Figure 2.0 Forest plot of studies reporting prevalence of childhood obesity among females in Ghana

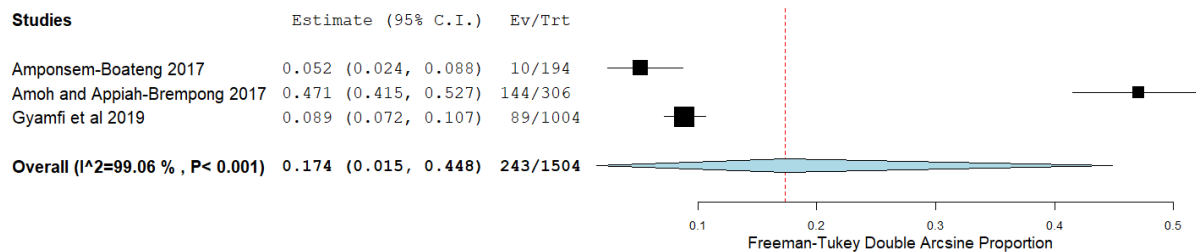

Figure 3.0 Forest plot of studies reporting prevalence of childhood obesity in rural settings in Ghana

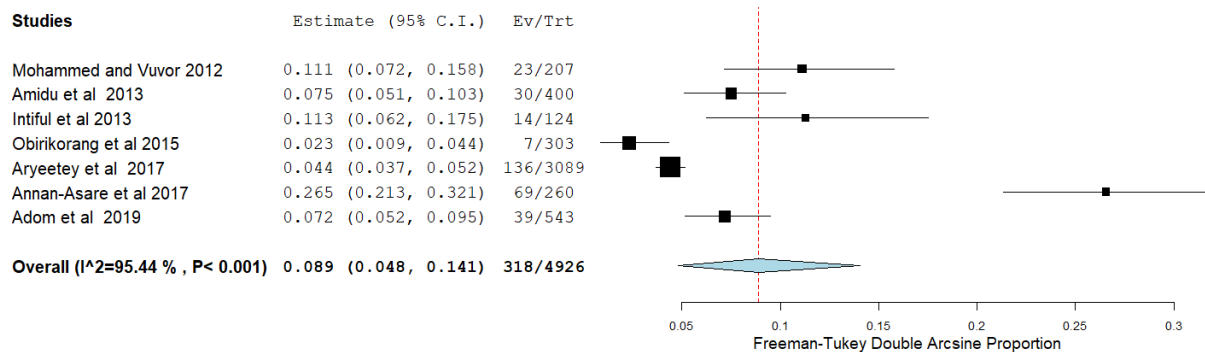

Figure 4.0 Forest plot of studies reporting prevalence of childhood obesity in urban settings in Ghana

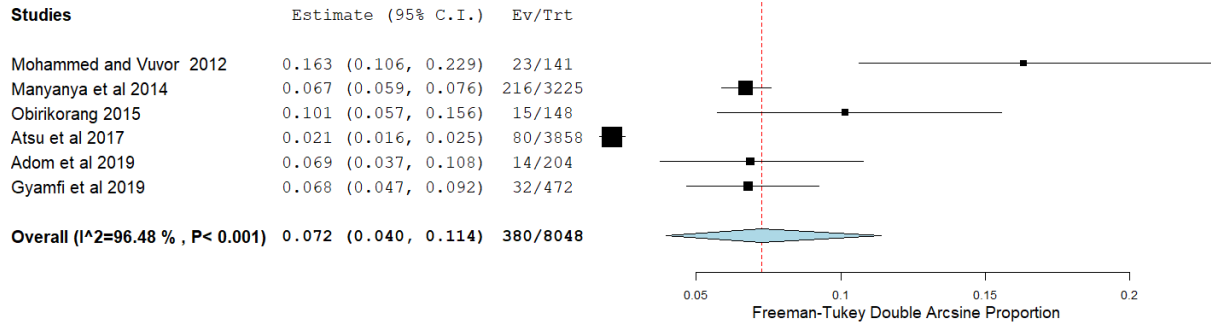

Figure 5.0 Forest plot of studies reporting prevalence of childhood overweight among males in Ghana

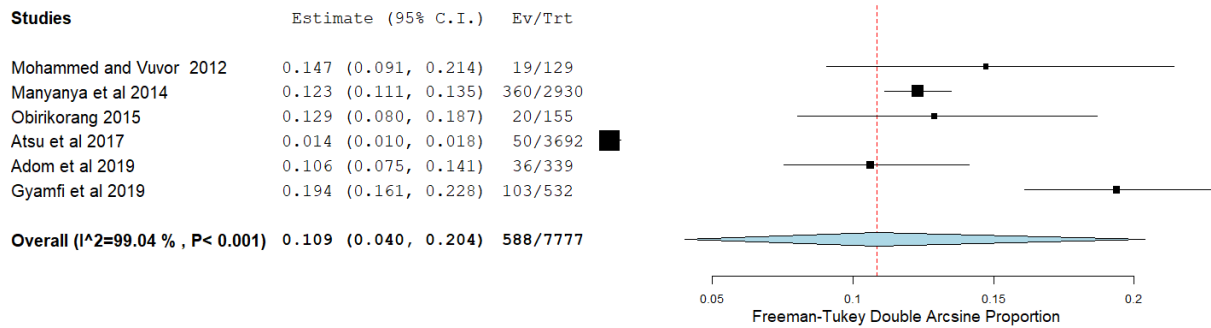

Figure 6.0 Forest plot of studies reporting prevalence of childhood overweight among females in Ghana

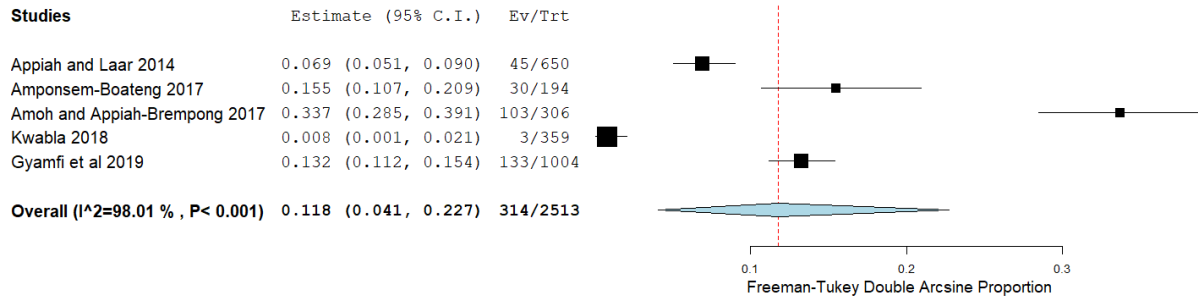

Figure 7.0 Forest plot of studies reporting prevalence of childhood overweight in rural settings in Ghana

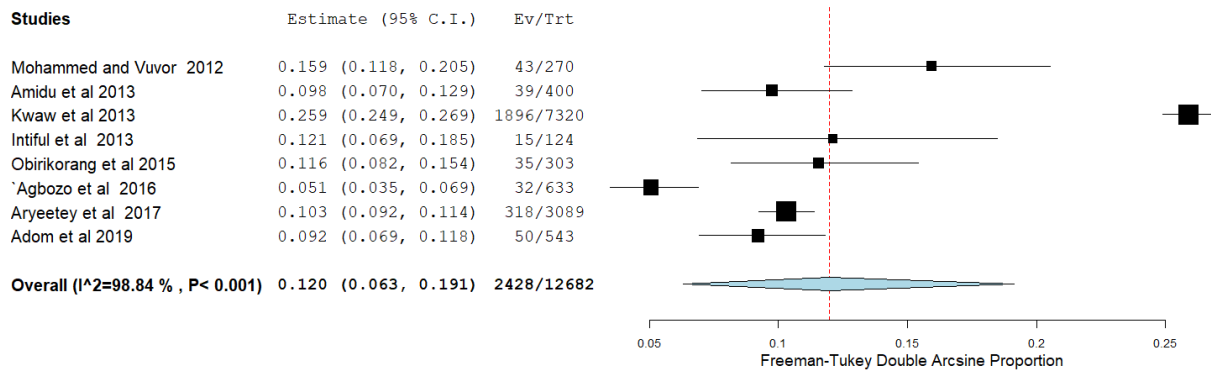

Figure 8.0 Forest plot of studies reporting prevalence of childhood overweight in urban settings Ghana
